# Supplementary material for: Population study of the gut microbiome: associations with diet, lifestyle, and cardiometabolic disease
Source: PubMed Central journal article supplement (PMC8680346; doi:10.1186/s13073-021-01007-5), 2021-12-17
Supplement: 13073_2021_1007_MOESM1_ESM.pdf [file 13073_2021_1007_MOESM1_ESM.pdf]

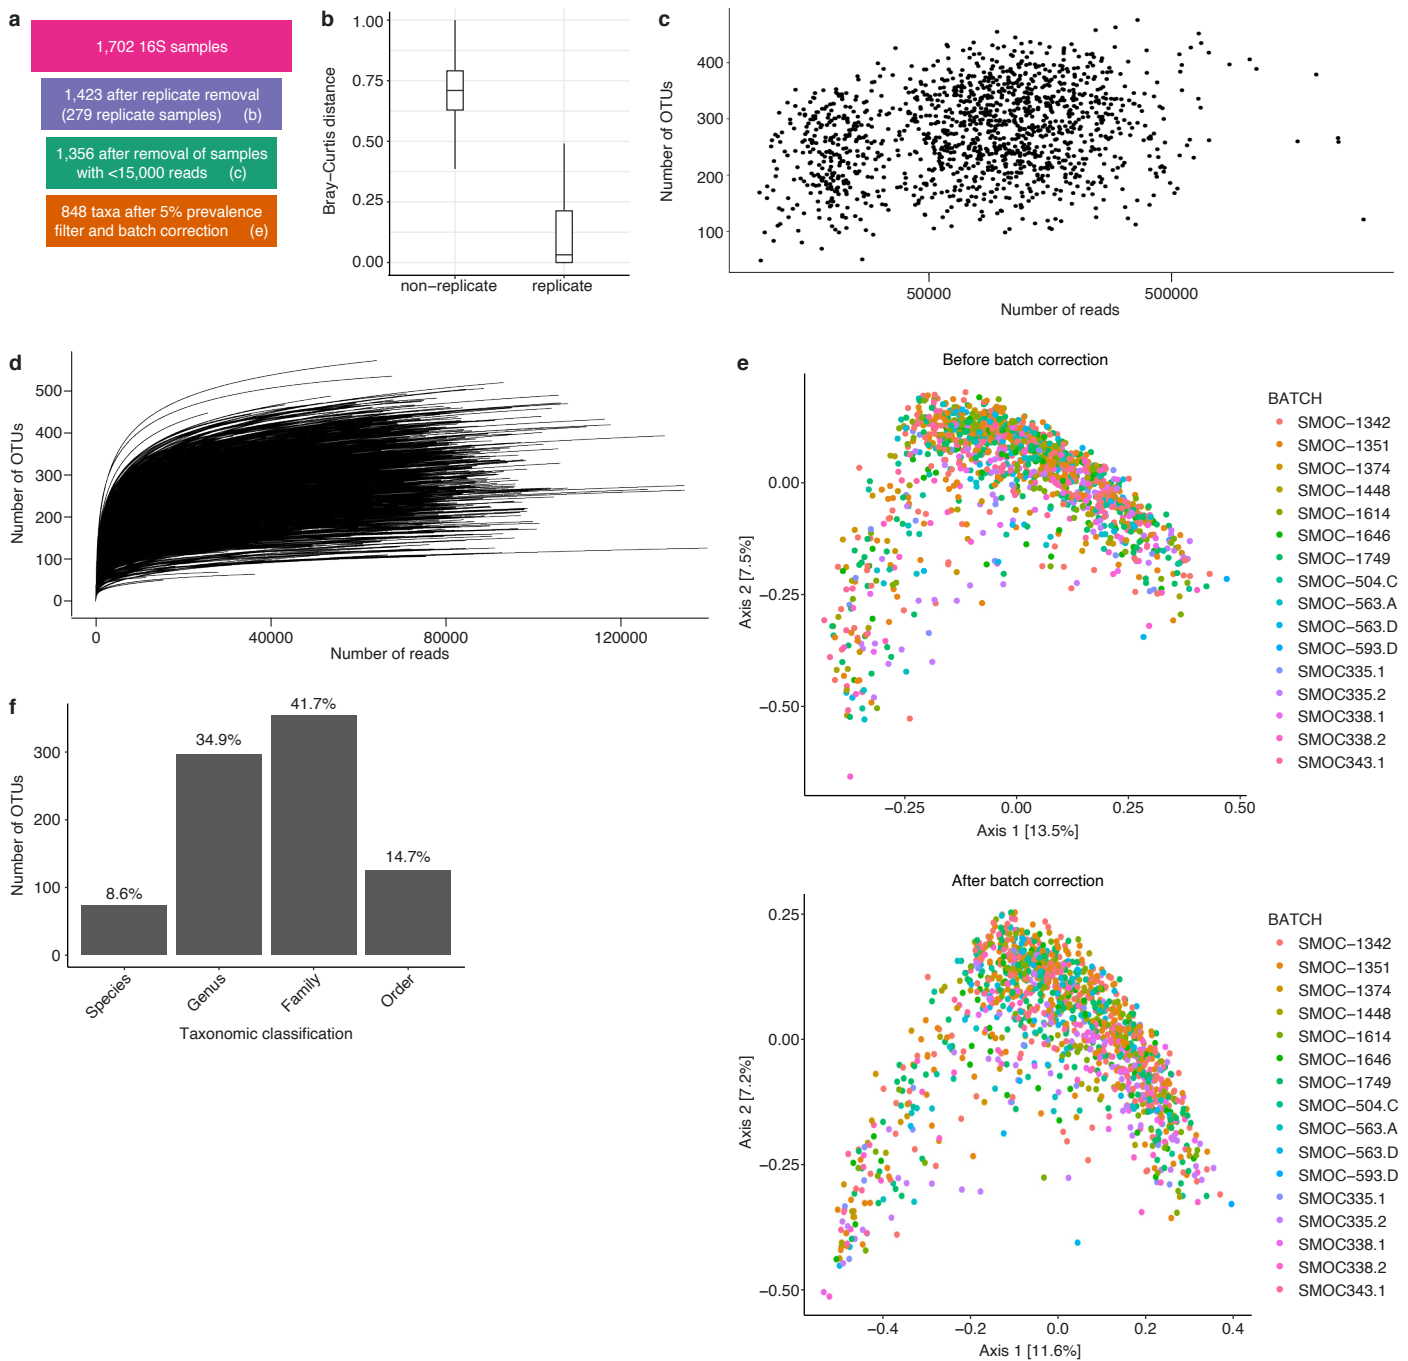

**Figure S1. Quality control of 16S sequencing data.** **a)** A sequential schematic of sample and OTU filtering steps. **b)** A boxplot of Bray-Curtis distances calculated from OTU-level relative abundances between replicate and non-replicate samples. **c)** A scatter plot of the number of reads per sample (after removal of samples with less than 15,000 reads) compared to the number of OTUs detected in that sample. **d)** Rarefaction curves where each line represents one sample, showing the number of OTUs detected (y-axis) when read depth is downsampled to the number of reads (x-axis). **e)** Ordination plots of relative OTU abundance colored by sequencing batch before and after batch correction by MMUPHin. **f)** A histogram of the level of taxonomic classification achieved for each OTU.

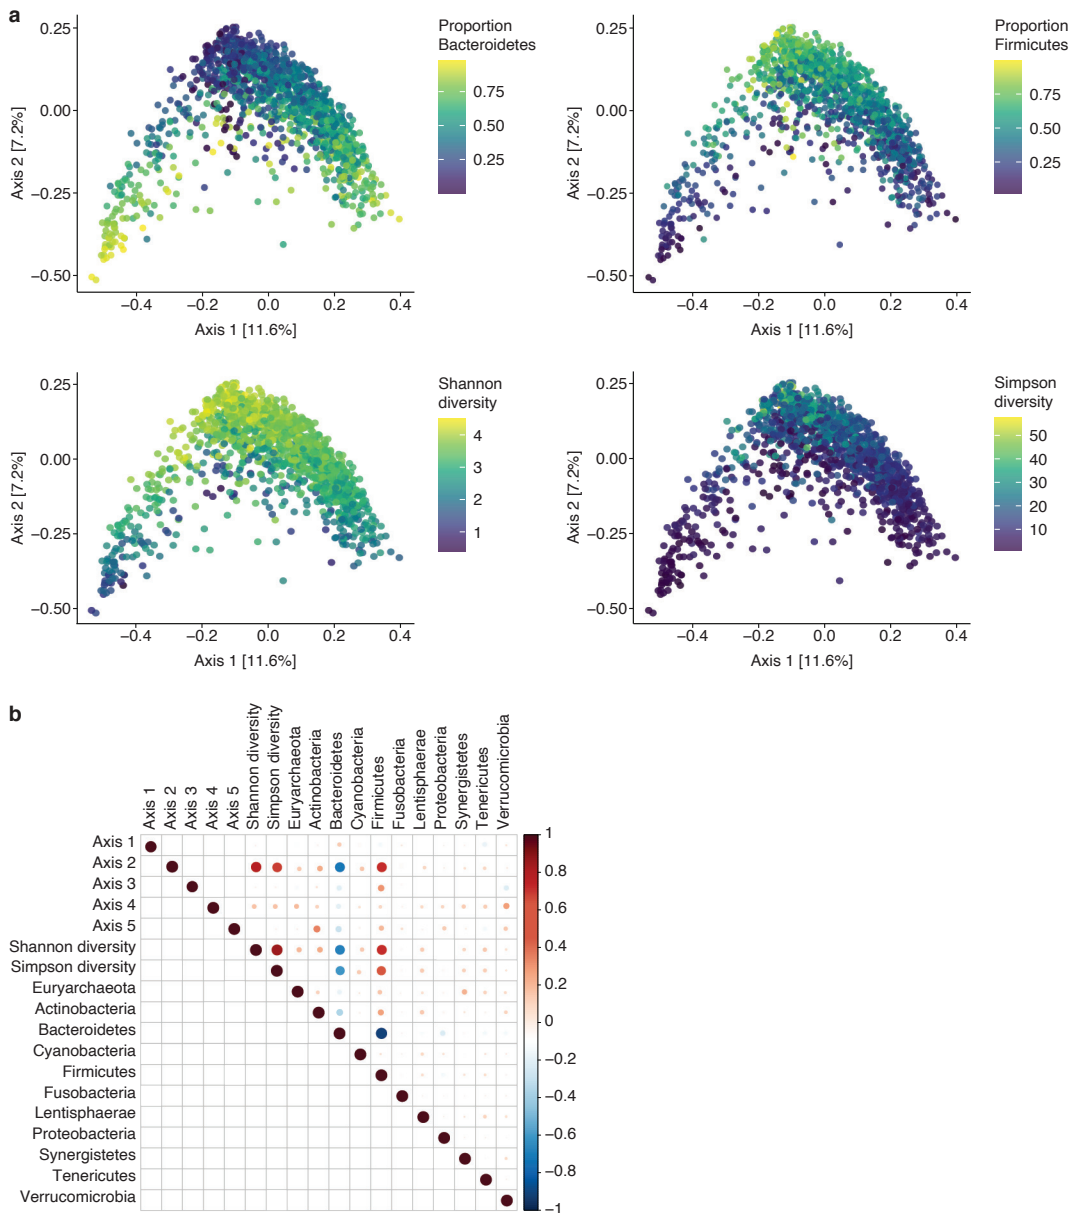

**Figure S2. Multidimensional scaling plots in relation to phylum-level measurements. a)** Multidimensional scaling (MDS/PCoA) analysis of Bray-Curtis distances calculated from OTU-level relative abundances. The two top axes of variation are shown on the x- and y-axis and respectively explain 11.6% and 7.2% of variation. Each dot represents an individual and is colored by the proportion of Bacteroidetes abundance, the proportion of Firmicutes abundance, Shannon diversity, and Simpson diversity. **b)** Pairwise correlations (Pearson) across the top 5 MDS axes from (a), Shannon diversity, Simpson diversity, and all phylum-level relative abundances across individuals. Strength of correlation is shown by both the size and color of the dot. Color additionally shows the direction of correlation.

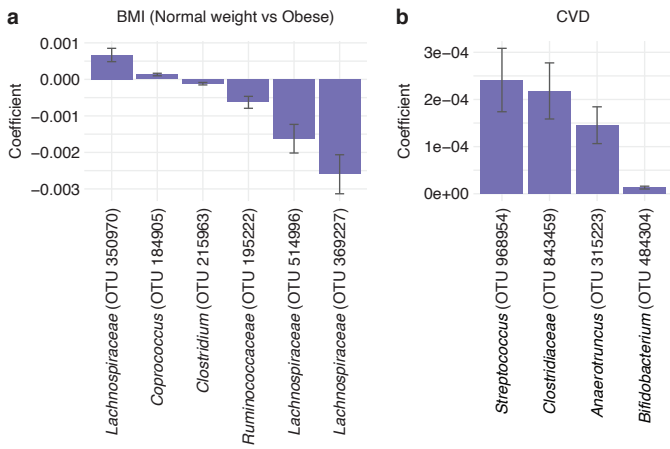

**Figure S3. Effect sizes of top microbial associations with BMI and CVD. a)** Bar plot of the coefficients from the linear model for significant OTUs associated with BMI status of normal weight versus obese participants. Standard error is shown. **b)** Bar plot of the coefficients from the linear model for significant OTUs associated with CVD status. Standard error is shown.
